# Supplementary material for: Constraints to counting bioluminescence producing cells by a commonly used transgene promoter and its implications for experimental design
Source: PubMed Central journal article supplement (PMC6683182; doi:10.1038/s41598-019-46916-z), 2019-08-05
Supplement: 41598_2019_46916_MOESM1_ESM.pdf [file 41598_2019_46916_MOESM1_ESM.pdf]

**Constraints to counting bioluminescence producing cells by a commonly used transgene promoter and its implications for experimental design**

Mosaad, E. O.; Futrega, K.; Seim, I.; Gloss, B.; Chambers, K. F.; Clements, J. A.; Doran, M. R.\*

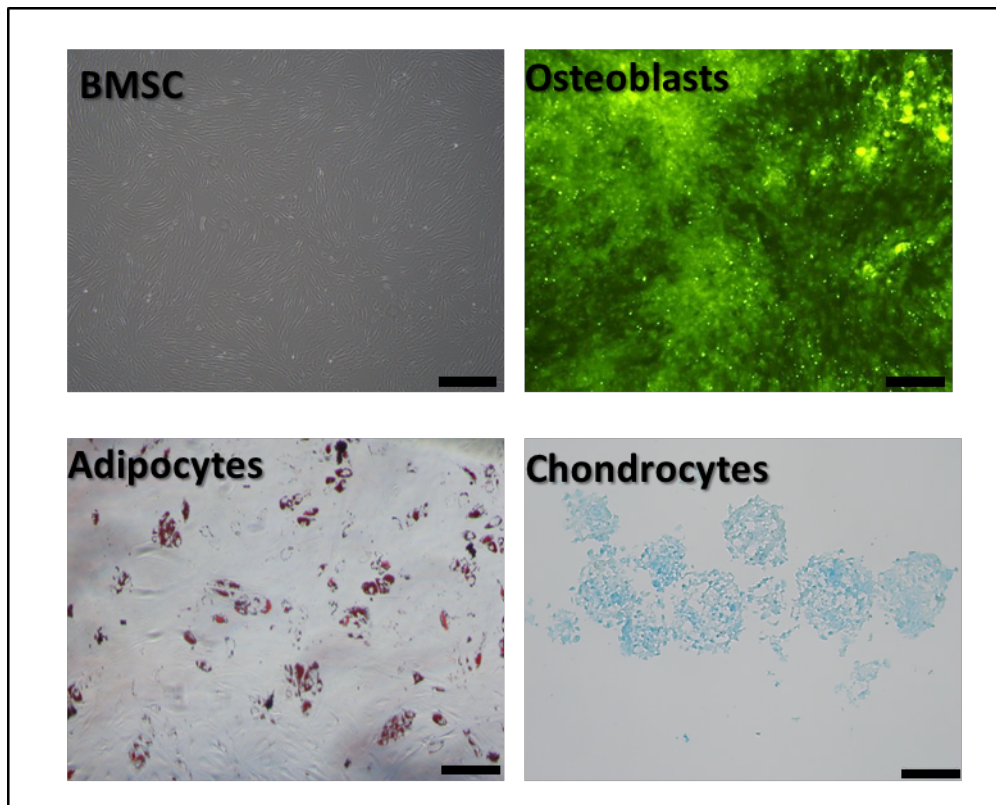

**Supplementary Figure 1. Characterization of bone marrow-derived mesenchymal stromal cells (BMSC) trilineage differentiation.** After isolation of BMSC, cells were seeded in monolayers for osteogenesis and adipogenesis induction; and in 3-dimensional cell aggregates for chondrogenesis induction. After 14 days, cells were fixed and stained with OsteoImage (green fluorescence staining of hydroxyapatite matrix, Osteoblasts), Oil Red O staining (red lipid vacuole staining, Adipocytes) or Alcian blue staining (blue staining of glycosaminoglycan matrix, Chondrocytes). Positive staining indicated mesodermal differentiation potential. Scale bars = 100  $\mu$ m.

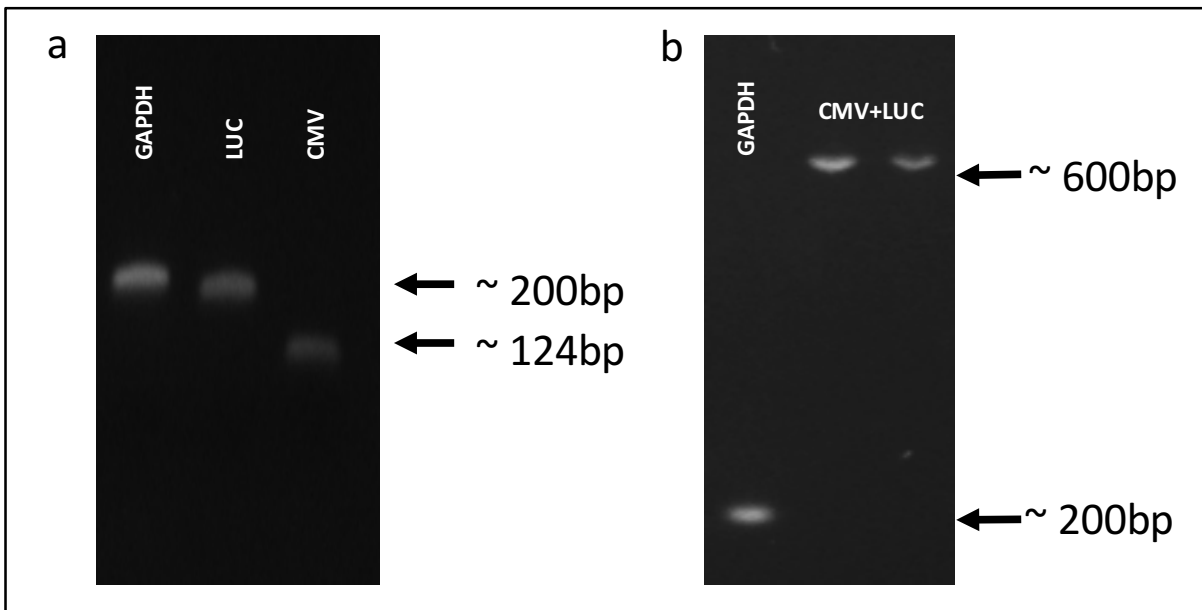

**Supplementary Figure 2.** PCR demonstrating a) the CMV promoter and luciferase gene are inserted in the C4-2B-CMV1 genome; and b) the CMV promoter and luciferase gene are adjacent in the C4-2B-CMV1 cell line. A band of approximately 600-base pair (bp) fragment which spans the two gene sequences. Control is the PCR reaction product from *GAPDH* (204 bp).

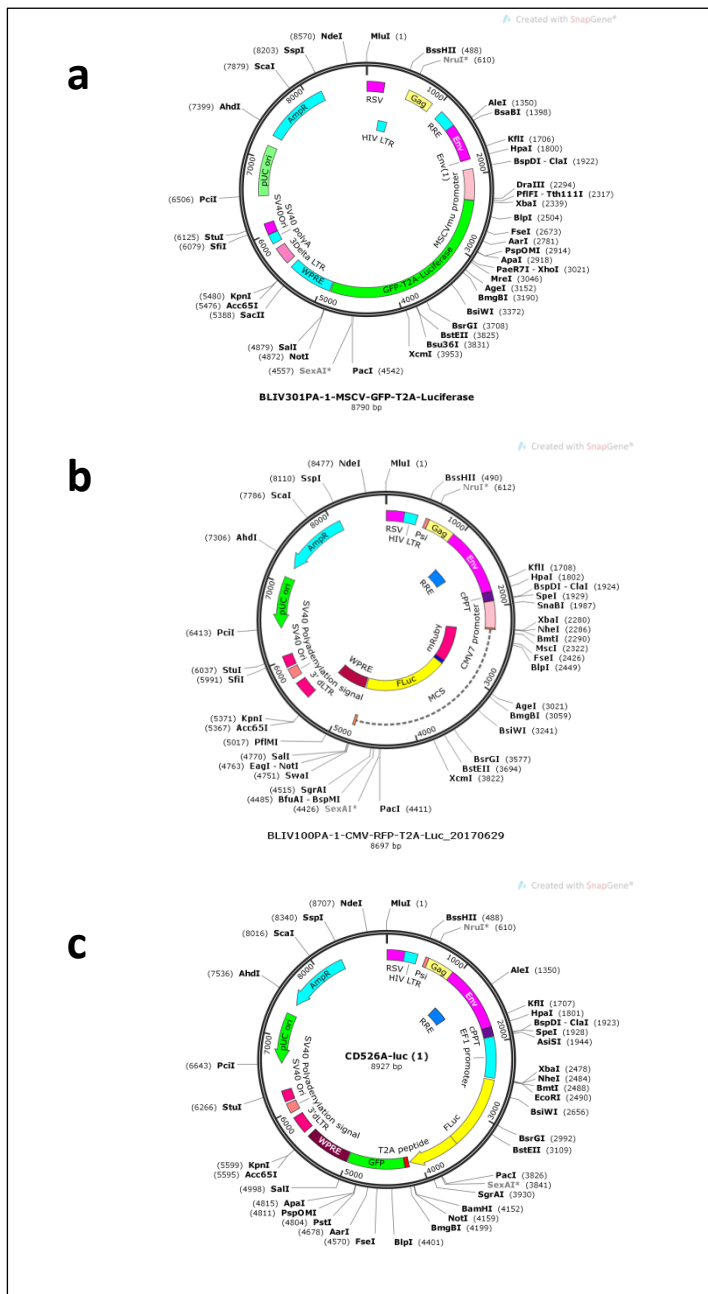

**Supplementary Figure 3.** Restriction maps of plasmids used in lentiviral particles production to transduce cells with luciferase gene with **(a)** MSCV, **(b)** CMV and **(c)** EF1a promoter regions. All plasmids were designed by System Biosciences (Bioluminescence Imaging Vectors, BLIV).

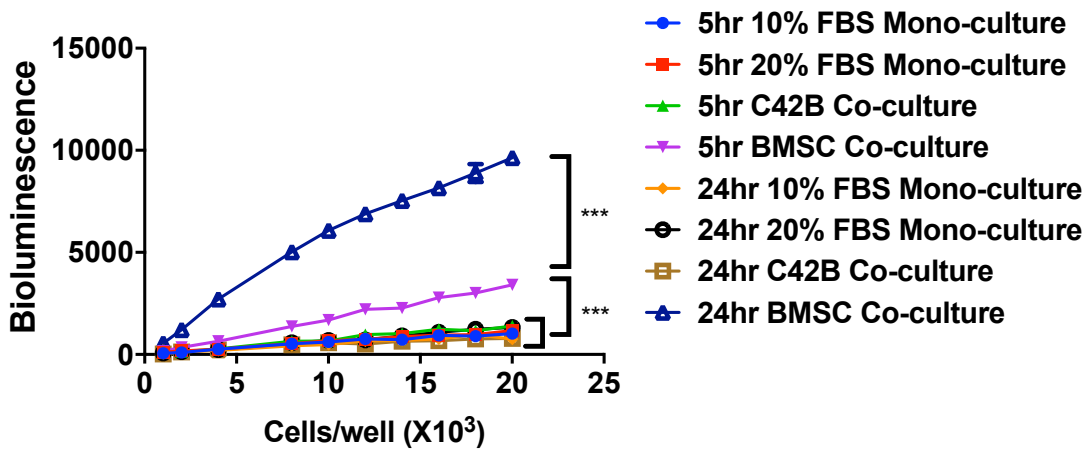

**Supplementary Figure 4.** The luciferase assay of C42B-CMV1 cells in mono- or co-culture with C42B-CMV1 cells or BMSC, or with different titrations of FBS. Increasing numbers of C42B-CMV1 cells were cultured in maintenance culture media (10% FBS Mono-culture), maintenance culture media supplemented with 20% FBS (20% FBS Mono-culture), directly cultured with  $10 \times 10^3$  parental untagged C42B cells (C42B co-culture) or directly cultured with  $10 \times 10^3$  BMSC (BMSC Co-culture) in 96-well plates. The bioluminescence was measured after 5 and 24 hours of culture establishment. Only co-culture with BMSC (open and closed purple triangles) resulted in an increase in bioluminescence signal. The graphed data represents the mean bioluminescence values of 6 replicate cultures at each time point and condition. Statistical significance was calculated using two-way ANOVA (\*\*\*) ( $P < 0.001$ ).

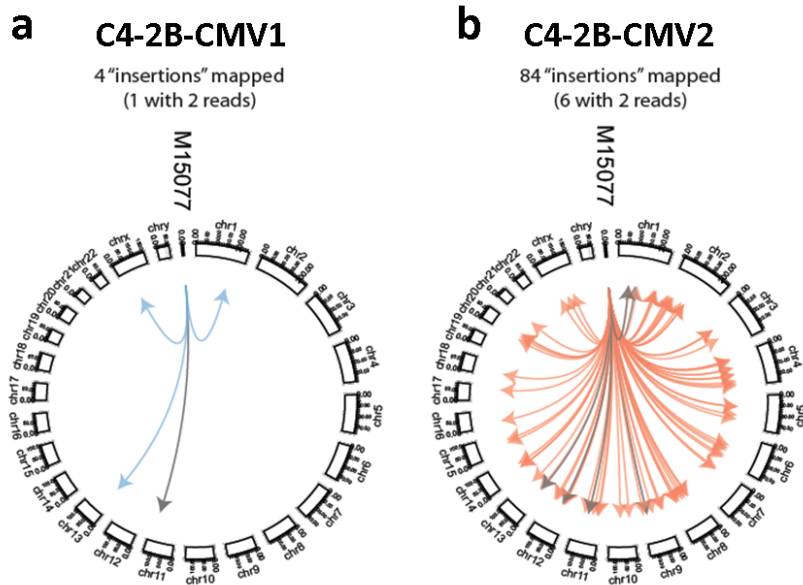

**Supplementary Figure 5. Luciferase gene insertion map.** Whole-genome sequencing data analysis of (a) C4-2B-CMV1 and (b) C4-2B-CMV2 revealed the number of insertion sites is 4 and 84 insertions, respectively.

**Supplementary Table 1.** List of bone marrow-derived mesenchymal stromal cell (BMSC) expression profile for cellular markers.

| Marker                         | Reactivity* |
|--------------------------------|-------------|
| CD45, CD34, CD271, HLA-DR      | -ve         |
| CD90, CD73, CD105, CD44, CD146 | +ve         |

\* (+ve) means > 95% and (-ve) means < 5% of the cell population.
